# Supplementary material for: Establishment and evaluation of a 30-minute detection method for SARS-CoV-2 nucleic acid using a novel ultra-fast real-time PCR instrument
Source: PubMed Central journal article supplement — J Thorac Dis. 2021 Dec;13(12):6866–75. doi: 10.21037/jtd-21-1288 (PMC8743416; doi:10.21037/jtd-21-1288), 2021-12
Supplement: jtd-13-12-6866-dss.pdf [file jtd-13-12-6866-dss.pdf]

## Data Sharing Statement

|                     |                                                                                                                                                    |                                                                                                                                                                              |
|---------------------|----------------------------------------------------------------------------------------------------------------------------------------------------|------------------------------------------------------------------------------------------------------------------------------------------------------------------------------|
| <b>Article Info</b> | <a href="https://dx.doi.org/10.21037/jtd-21-1288">https://dx.doi.org/10.21037/jtd-21-1288</a>                                                      |                                                                                                                                                                              |
| <b>Item</b>         | <b>Question</b>                                                                                                                                    | <b>Authors' Response</b><br>(place "-" if not applicable)                                                                                                                    |
| 1                   | Would you like to share data collected for your study to others?                                                                                   | Yes                                                                                                                                                                          |
| 2                   | If not, would you like to share the reason for your decision?                                                                                      | -                                                                                                                                                                            |
| 3                   | What data in particular will be shared?                                                                                                            | The clinical performance of the established methods.                                                                                                                         |
| 4                   | Any other documents will be share? Such as study protocol, statistical analysis plan, informed consent form, clinical study report, analytic code. | All documents have been presented in the main text or supplementary materials. If anyone has any other questions, you are still welcome to consult the corresponding author. |
| 5                   | When will data availability begin?                                                                                                                 | It will be available after the article is published.                                                                                                                         |
| 6                   | When will data availability end?                                                                                                                   | End time is unlimited.                                                                                                                                                       |
| 7                   | To whom will you share the data?                                                                                                                   | To all those who are interested.                                                                                                                                             |
| 8                   | For what type of analysis or purpose?                                                                                                              | Reasonable and legitimate scientific and technological exchanges and cooperation.                                                                                            |
| 9                   | How or where can the data/documents be obtained?                                                                                                   | All data have been presented in the main text or supplementary materials. If anyone has any other questions, you are still welcome to consult the corresponding author.      |
| 10                  | Any other restrictions?                                                                                                                            | There are no special restrictions, but there must be legitimate and reasonable reasons.                                                                                      |
